# Supplementary material
Source: Springer Nature journal article supplement (https://www.springermedizin.de/resource/supplementary/12916_2012_666_MOESM5_ESM.pdf/9598032)

A

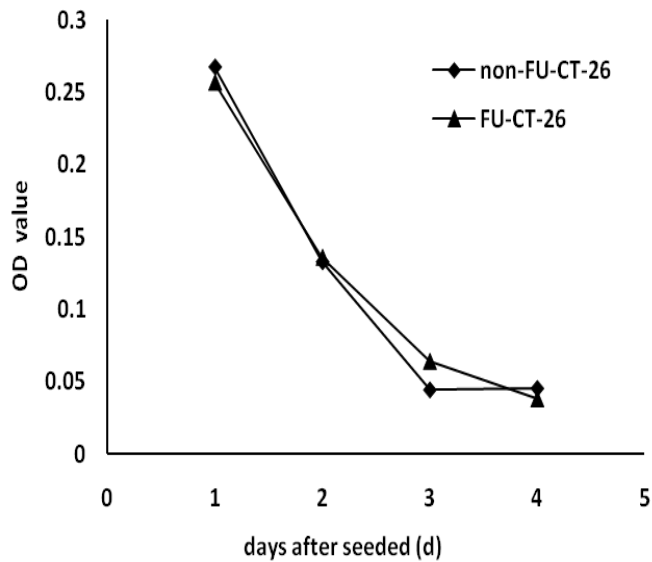

B

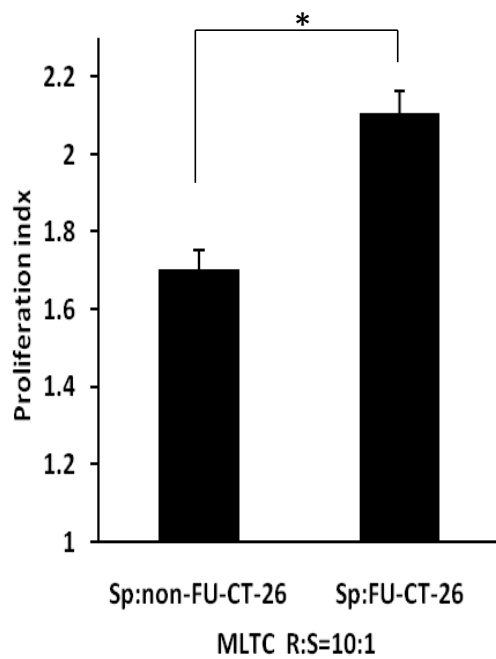

C

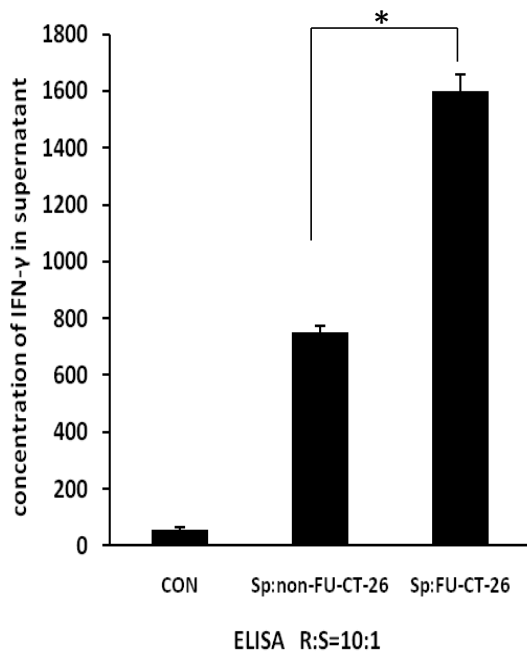

Supplement: MOESM5 [file 9598032]
